# Supplementary material
Source: Research Square preprint supplement (doi:10.21203/rs.3.rs-9098586/v1)
Supplement: Supplementary file 1 [file 3154b77ac7459cd6c62e68a9.docx]

**Supplemental Table 1. TaqMan human gene expression assay IDs for qRT-PCR**

| **Target/ Gene symbol** | **Assay ID** |
| --- | --- |
| *18S* | Hs03003631_g1 |
| *POU5F1 (OCT4)* | Hs00999632_g1 |
| *SOX2* | Hs04234836_s1 |
| *NANOG* | Hs02387400_g1 |
| *GATA4* | Hs00171403_m1 |
| *WT1* | Hs01103751_m1 |
| *TJP1* | Hs01551861_m1 |
| *TCF21* | Hs00162646_m1 |
| *FN1* | Hs01549976_m1 |
| *COL1A1* | Hs00164004_m1 |
| *PECAM1* | Hs00169777_m1 |
| *MYH11* | Hs00224610_m1 |
| *MYH6* | Hs01101425_m1 |

**Supplemental Table 2. Reagents for tissue culture and assays**

| **Item** | **Vendor** | **Catalog #** |
| --- | --- | --- |
| PureCol EZ Gel Type I Collagen | Advanced Biomatrix | 5075 |
| Y27632 | APExBIO | A3008 |
| TaqMan Fast Advanced Master Mix (2x) | Applied Biosystems | 4444556 |
| EveryBlot Blocking Buffer | Bio-Rad | 12010020 |
| 4X Laemmli Sample Buffer | Bio-Rad | 1610747 |
| 2-Mercaptoethanol | Bio-Rad | 1610710 |
| Dual Color Protein Ladder | Bio-Rad | 1610394 |
| 10X Tris/Glycine/SDS Buffer | Bio-Rad | 1610732 |
| 10X TBS | Bio-Rad | 1706435 |
| Trans-Blot Turbo Transfer Pack Mini Format, 0.2 μm nitrocellulose | Bio-Rad | 1704158 |
| Mini-Protean TGX Gels 4-20% | Bio-Rad | 4561093 |
| CHIR99021 | Cayman | 13122 |
| hESC-qualified Matrigel | Corning | 354277 |
| RPMI-1640 Medium (1X) | Cytiva | SH30096.01 |
| Dulbecco's Modification of Eagle's Medium (DMEM)/F12 1:1 (1X) | Cytiva | SH30023.01 |
| Triton-X-100 | Fisher Biotech | BP151 |
| Tween 20 | Fisher Scientific | BP337 |
| B27 Supplement Minus Insulin (50X) | Gibco | A18956-01 |
| B27 Supplement (50X) | Gibco | 17504-044 |
| PBS | Gibco | 14190-144 |
| Advanced DMEM/F12 (1X) | Gibco | 12634-010 |
| GlutaMAX (100X) | Gibco | 35050-061 |
| Fetal Bovine Serum | Gibco | A52095-01 |
| TrypLE Express | Gibco | 12604-013 |
| Human male iPSCs | Greenstone Biosciences, Inc. | GSB-L2053 |
| ProLong Diamond Antifade Mountant with DAPI | Invitrogen | P36962 |
| h-FGFB | Peprotech | 160-18B-10UG |
| Insulin | Gibco | 12-585-014 |
| TGF-b1 | Bon Opus | CA59-10UG |
| Human Cardiac Ventricular Fibroblasts | Lonza | CC-2904 |
| Retinoic Acid | MedChemExpress | HY-14649 |
| SB431542 | MedChemExpress | HY-10431 |
| RNeasy Mini Kit | QIAGEN | 74106 |
| Goat Serum | Sigma | G9023 |
| Albumin, from bovine serum, fraction V | Sigma | A9647 |
| 6-well tissue culture plate | Midwest Scientific | TP92006 |
| Primaria tissue culture plate | Corning | 353846 |
| ECIS wound healing electrode array | Applied Biophysics | 8W1E PET |
| IWP-2 | STEMCELL | 72124 |
| mTeSR Plus Medium | STEMCELL Technologies | 100-0276 |
| Gentle Cell Dissociation Reagent | STEMCELL Technologies | 100-0485 |
| Pierce RIPA Buffer | Thermo Scientific | 89901 |
| Halt Protease and Phosphatase Inhibitor Single-Use Cocktail (100X) | Thermo Scientific | 1861280 |
| Pierce BCA Protein Assay Kit | Thermo Scientific | 23227 |
| 16% Formaldehyde Solution (w/v), Methanol Free (to make 4% in PBS) | Thermo Scientific | 28908 |

**Supplemental Table 3. Software**

| **Software** | **Vendor** | **RRID #** |
| --- | --- | --- |
| Quantity One 1-D Analysis Software | Bio-Rad | RRID:SCR_014280 |
| GraphPad Prism 10 | Dotmatics | RRID:SCR_002798 |
| Fiji (Fiji is just ImageJ) | N/A | RRID:SCR_002285 |
| ZEISS ZEN Microscopy Software | Zeiss | RRID:SCR_013672 |

**Supplemental Table 4. Antibodies**

| **Antigen** | **Vendor** | **Catalog #** | **RRID#** |
| --- | --- | --- | --- |
| α-Smooth Muscle Actin Mouse Monoclonal  (1:400 for IF) | Abcam | ab7817 | RRID:AB_262054 |
| SSEA4 (1:200 for IF) | Cell Signaling Technologies | 4755T | RRID:AB_1264259 |
| OCT4 (1:200 for IF) | Cell Signaling Technologies | 2840T | RRID:AB_2167691 |
| NANOG (1:200 for IF) | Cell Signaling Technologies | 4903T | RRID:AB_10559205 |
| WT1 (1:200 for IF) | Cell Signaling Technologies | 83535T | RRID:AB_2800020 |
| ZO-1 (1:200 for IF) | Proteintech | 21773-1-AP | RRID:AB_10733242 |
| DDR2 (1:200 for IF) | Proteintech | 67126-1-Ig | RRID:AB_2882426 |
| Vinculin (1:500 for IF) | Proteintech | 66305-2-Ig | RRID:AB_3670375 |
| Vimentin Rabbit Monoclonal  (1:200 for IF) | Cell Signaling Technologies | 5741 | RRID:AB_10695459 |
| Peroxidase AffiniPure® Goat Anti-Mouse IgG (H+L) (1:5000 for Immunoblotting) | Jackson ImmunoResearch Inc. | 115-035-003 | RRID:AB_10015289 |
| Peroxidase AffiniPure® Goat Anti-Rabbit IgG (H+L) (1:5000 for Immunoblotting) | Jackson ImmunoResearch Inc. | 111-035-003 | RRID: AB_2313567 |
| α-Smooth Muscle Actin Mouse Monoclonal  (1:1000 for Immunoblotting) | Sigma | A2547 | RRID:AB_476701 |
| GAPDH-HRP  (1:2000 for Immunoblotting) | ThermoFisher Scientific | MA5-15738-HRP | RRID:AB_2537659 |
| Calnexin  (1:500 for Immunoblotting) | Santa Cruz Biotechnology | sc-11397 | RRID:AB_2243890 |
| OxPhos Human WB Antibody Cocktail  (1:250 for Immunoblotting) | Invitrogen | 45-8199 | RRID:AB_2533836 |
| Phalloidin Alexa Fluor 647 (1:400 for IF) | ThermoFisher Scientific | A22287 | N/A |
| CoraLite® Plus 594- Phalloidin (1:400 for IF) | Proteintech | PF00003 | N/A |
| Goat anti-Rabbit IgG (H+L) Secondary Antibody, Alexa Fluor™ Plus 488  (1:800 for IF) | ThermoFisher Scientific | A32731 | RRID:AB_2633280 |
| Goat anti-Mouse IgG (H+L) Secondary Antibody, Alexa Fluor™ Plus 594  (1:800 for IF) | ThermoFisher Scientific | A32742 | RRID:AB_2762825 |

IF= Immunofluorescence

HRP= Horseradish peroxidase
